# Supplementary material
Source: Research Square preprint supplement (doi:10.21203/rs.3.rs-9207401/v1)
Supplement: Supplementary file 1 [file 00290e5209a4ed6ec64bf39c.docx]

**Comparison of the treatment efficiency of aerobic granular sludge with bacterial-algal symbiotic aerobic granular sludge on wastewater containing dibutyl phthalate and the effect of DBP on the system processing of traditional pollutants**

Xin Lia, Yun Jib, Shenbao Qu a,c, Man Wei a, Xia Hu a *, Aijiang Yang a, Shiying Song d,e

*aCollege of Resource and Environmental Engineering, Guizhou University, Guizhou Karst Environmental Ecosystems Observation and Research Station, Key Laboratory of Karst Georesources and Environment, Ministry of Education, Guiyang 550025, China*

*bGuizhou Key Laboratory of Agricultural Biotechnology, Guiyang 550009, China;*

*cSchool of Civil Engineering, Wuhan University, No. 8, East Lake South Road, Wuhan 430072, China*

*dMinistry of Agriculture and Rural Affairs Key Laboratory of Crop Genetic Resources and Germplasm Innovation in Karst Region, Guiyang 550009, China.*

*eLiupanshui Polytechnic, Liupanshui 553000, China*

Corresponding authors：

E-mail addresses: xhu5@gzu.edu.cn (X. Hu).

**Table S1 List of main chemical agents for experiments**

| Reagent | Purity | Manufacturer |
| --- | --- | --- |
| Sodium acetate | AR | Sinopharm Chemical Reagents Co., Ltd. |
| Ammonia chloride | AR | Sinopharm Chemical Reagents Co., Ltd. |
| Magnesium sulfate | AR | Tianjin Kemio Chemical Reagents Co., Ltd. |
| DBP | AR | Shanghai Aladdin Biochemical Technology Co., Ltd. |
| Calcium chloride | AR | Shanghai McLean Biochemical Technology |
| Muriate | AR | Tianjin Kemio Chemical Reagents Co., Ltd. |
| Monopotassium phosphate | AR | Tianjin Benchmark Chemical Reagents Co., Ltd. |
| Silver sulfate | AR | Tianjin Tiangan Chemical Technology Development Co., Ltd. |
| complexon II | AR | Xilong Chemical Co., Ltd. |
| Nessler's reagent | AR | Changde Beimank Biotechnology Co., Ltd. |
| Seignette salt | AR | Tianjin Kemio Chemical Reagents Co., Ltd. |
| acetonitrile | chromatographic pure | American TEDIA "Tian Di" Company |
| antimony potassium tartrate | AR | Wuhan Dinggao Technology Co., Ltd. |
| methyl alcohol | chromatographic pure | American TEDIA "Tian Di" Company |
| sodium hydrate | AR | Harbin Chemical Reagents Factory |
| Comass Bright Blue G250 | AR | Beijing Solabao Technology Co., Ltd. |


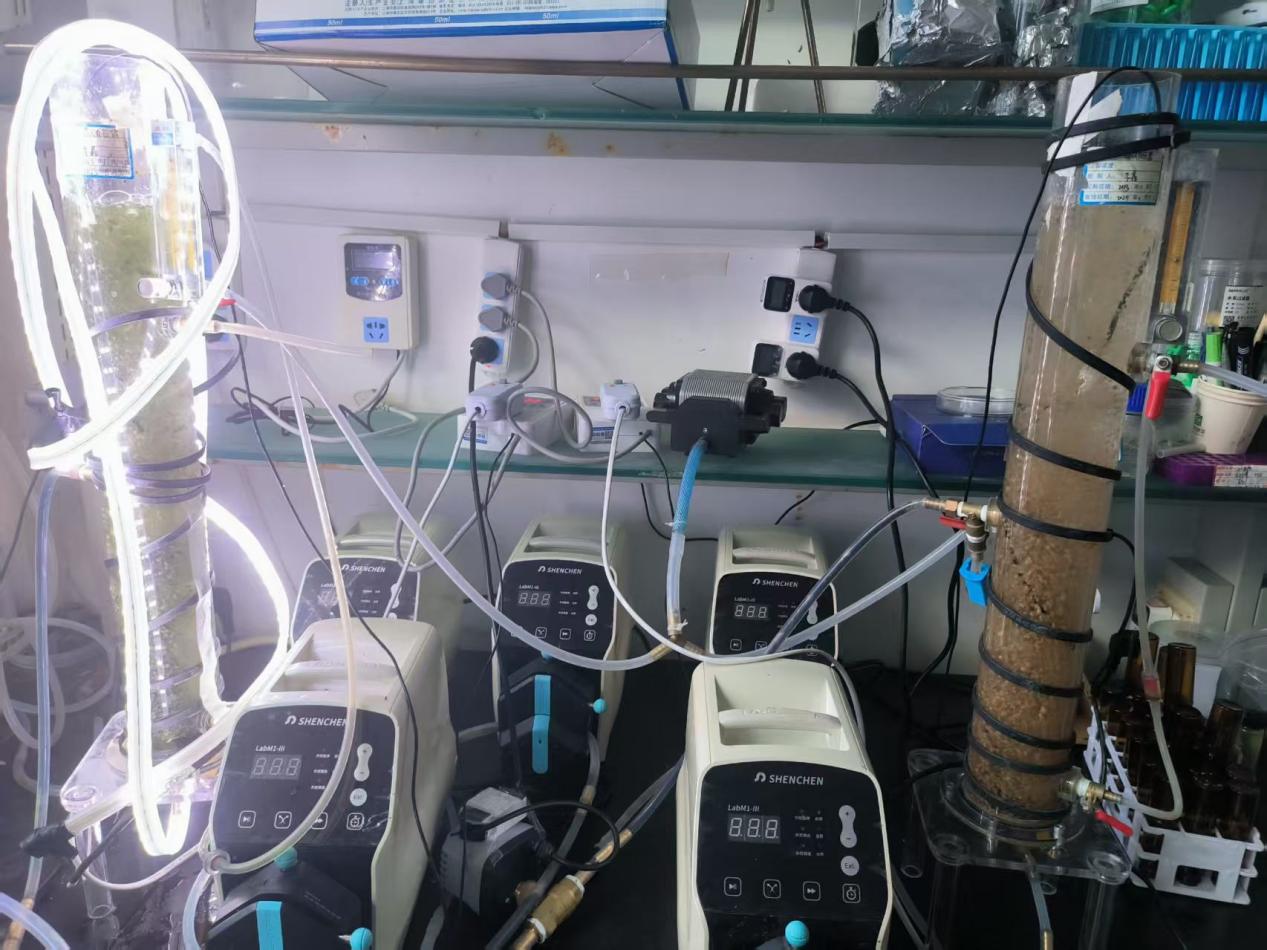


Fig. S1 Physical image of the reactor.

**Table S2 Synthetic Sewage Formulations**

| Component | Reagent | Concentration（mg/L） |
| --- | --- | --- |
| COD | Anhydrous sodium | 300 |
| DBP | DBP | 0.5、1、5、10 |
| Magnesian ion | Magnesium sulfate | 20 |
| Calcium ion | Calcium chloride | 20 |
| Potassium ion | Muriate | 20 |
| Ammonia nitrogen | Ammonia chloride | 30 |
| TP | Monopotassium phosphate | 10 |

| *Sample* | *sobs* | ACE | Chao | *shannon* | *simpson* | *shannoneven* | *coverage* | *Pielou_e* |
| --- | --- | --- | --- | --- | --- | --- | --- | --- |
| ***R1-Ⅰ*** | 4706.67 | 4706.67 | 4706.67 | 5.05 | 0.05 | 0.60 | 1.00 | 0.60 |
| ***R1-Ⅴ*** | 4589.67 | 4589.67 | 4589.67 | 4.84 | 0.06 | 0.57 | 1.00 | 0.57 |
| ***R2-Ⅰ*** | 4989.33 | 4989.33 | 4989.33 | 5.09 | 0.05 | 0.60 | 1.00 | 0.60 |
| ***R2-Ⅴ*** | 4656.67 | 4656.67 | 4656.67 | 4.87 | 0.06 | 0.58 | 1.00 | 0.58 |

**Table S3 Alpha diversity parameters of microorganisms**


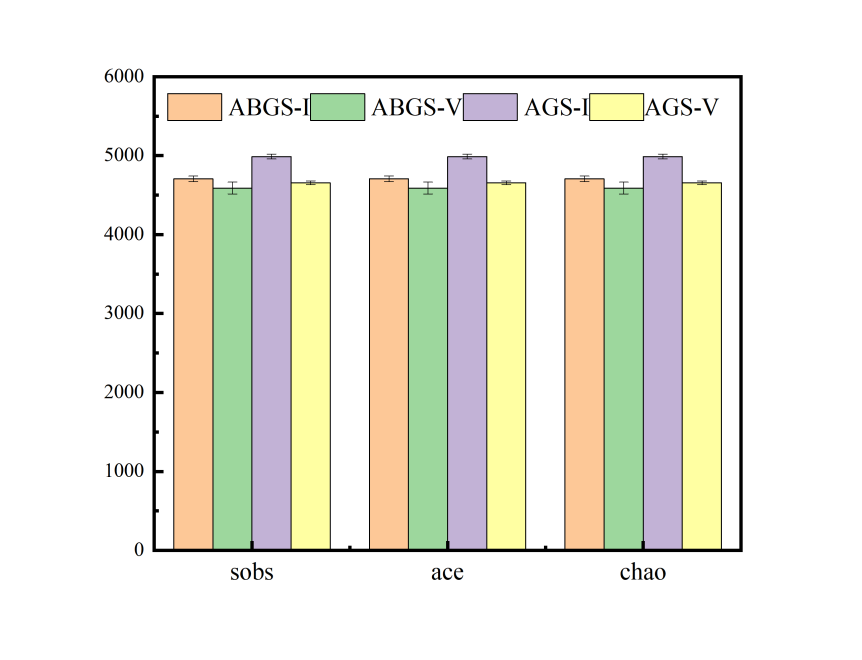


**Fig.S2 Sobs, ACE, Chao indices**


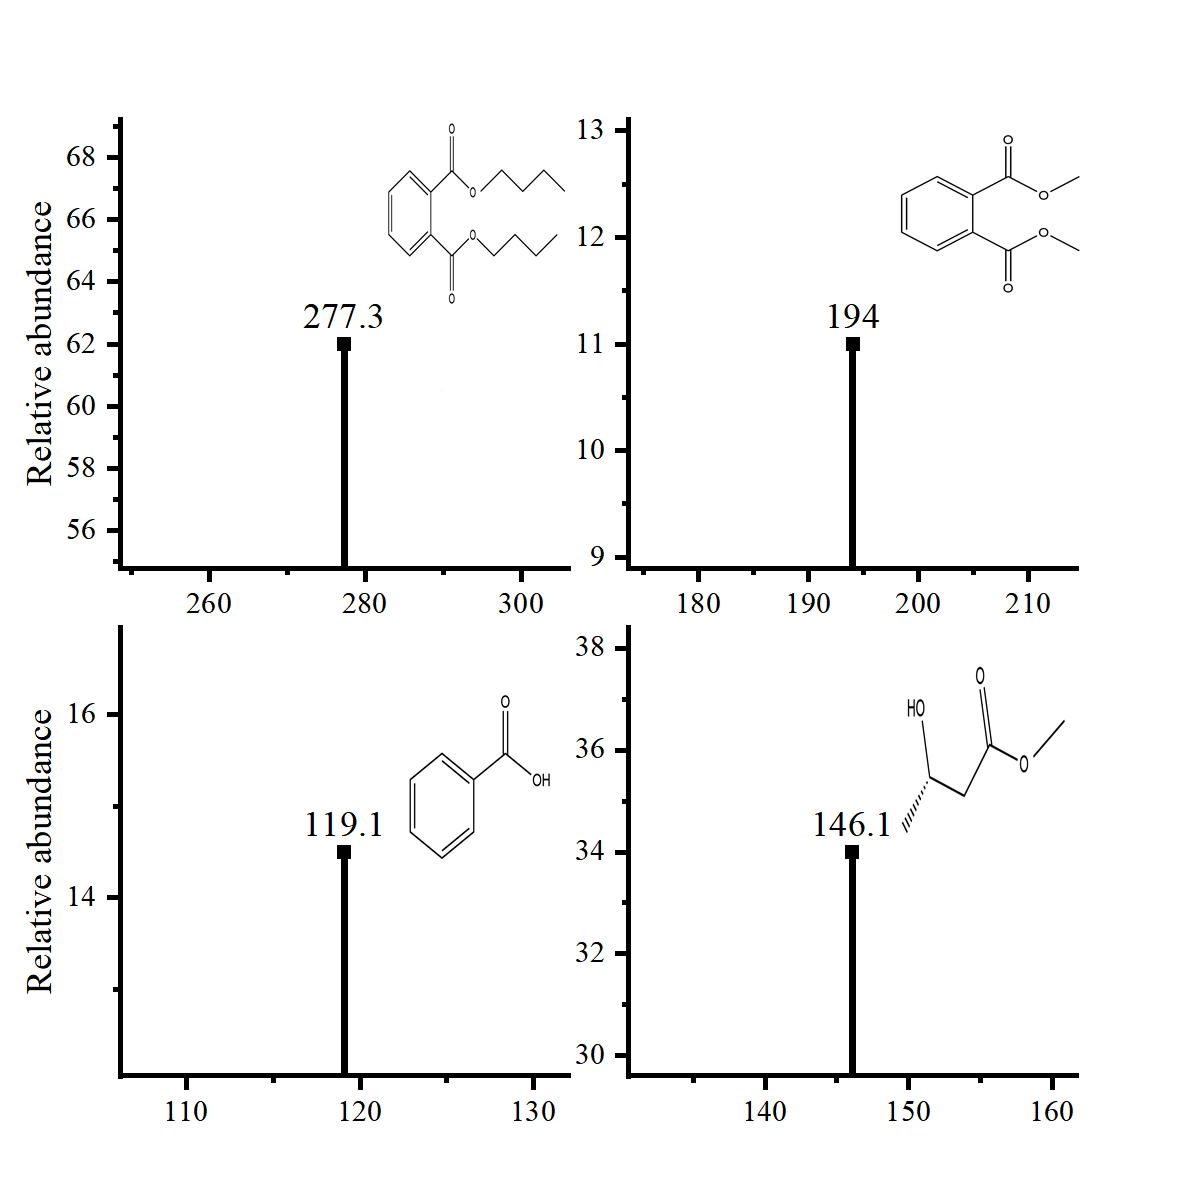


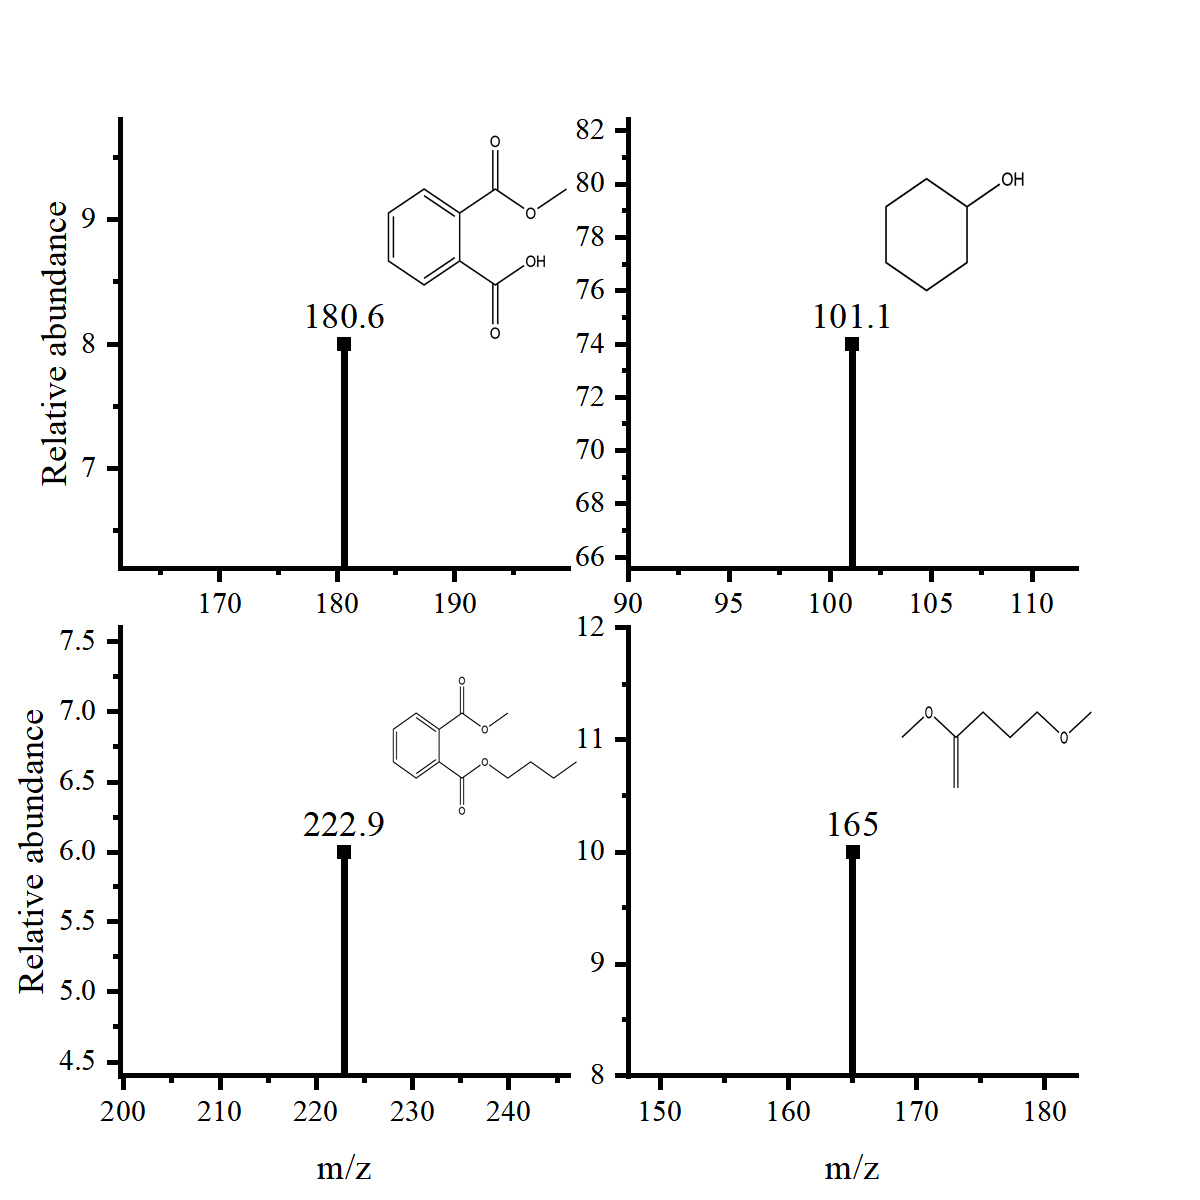


**Fig.S3 Intermediate detected by GC/MS**
